# Supplementary material for: Antimicrobial Peptides Originating from Expression Libraries of Aurelia aurita and Mnemiopsis leidyi Prevent Biofilm Formation of Opportunistic Pathogens
Source: MDPI journal article supplement (doi:10.3390/microorganisms11092184), 2023-08-29
Supplement: s1 [file s1]

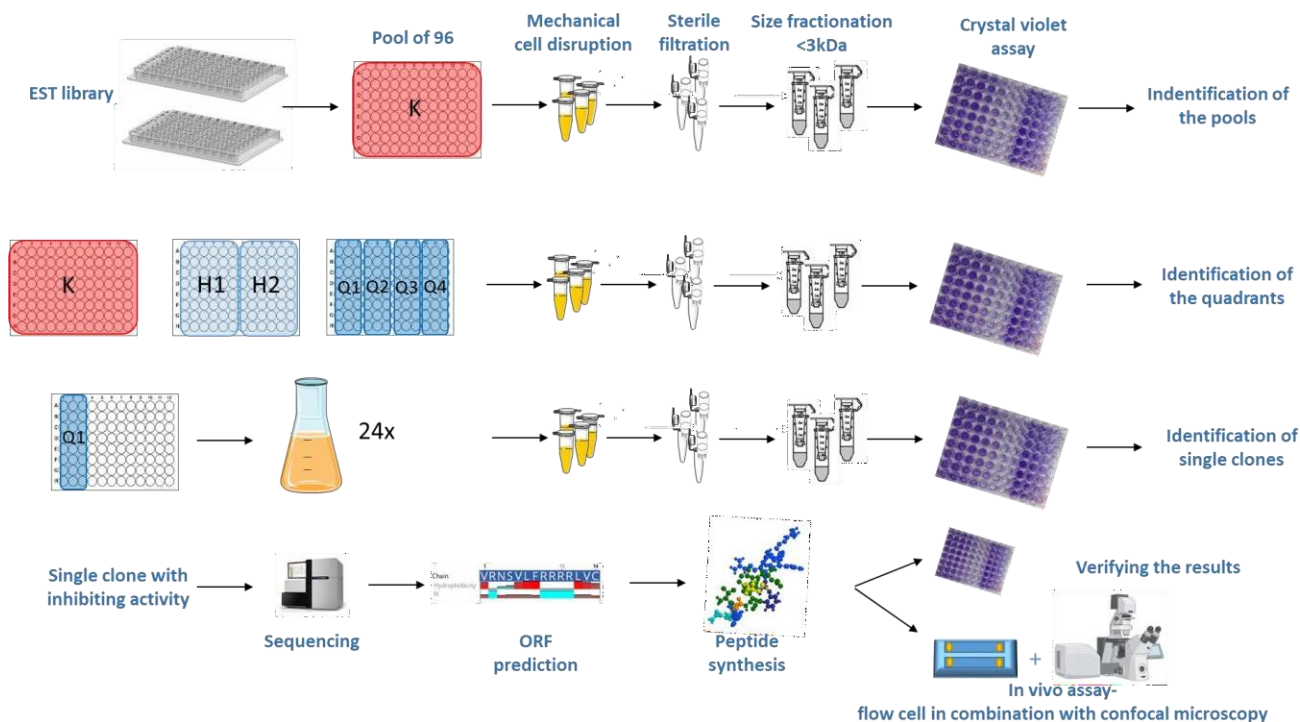

**Figure S1: Identification of biofilm-inhibiting clones from the cDNA expression library using the crystal violet assay.** Cell-free size-fractionated cell extracts were prepared successively from pools of 96, 48, 24, and single clones. Biofilm-inhibiting single clones were further characterized to identify the corresponding peptides.

**Table S1: Identified biofilm-preventing cDNA single clones.** Biofilm-preventing single clones were identified in cDNA expression libraries of *A. aurita* and *M. leidyi* using the crystal violet assay. Activity-conferring sequences were gainedand the respective sORFs N-terminally fused to the vector-derived Histidine-tag were translated into peptide sequences. NCBI BLASTp results for those peptide sequences are shown.

| Single clone designation | Peptide designation | Insert (5'-3') ( <u>vector proportion</u> )                                                                                                                                                                                                                                                                                                                                                                                                                                                                                                                                                                                                                                                                                                                                                                                                                                                                                                                                                                                                                  | Amino acid sequences of the in-frame ORF | NCBI BLASTp                                         |               |                    |              |
|--------------------------|---------------------|--------------------------------------------------------------------------------------------------------------------------------------------------------------------------------------------------------------------------------------------------------------------------------------------------------------------------------------------------------------------------------------------------------------------------------------------------------------------------------------------------------------------------------------------------------------------------------------------------------------------------------------------------------------------------------------------------------------------------------------------------------------------------------------------------------------------------------------------------------------------------------------------------------------------------------------------------------------------------------------------------------------------------------------------------------------|------------------------------------------|-----------------------------------------------------|---------------|--------------------|--------------|
|                          |                     |                                                                                                                                                                                                                                                                                                                                                                                                                                                                                                                                                                                                                                                                                                                                                                                                                                                                                                                                                                                                                                                              |                                          | Best homologue                                      | Assession No. | Query Coverage [%] | Identity (%) |
| Aa_112_4H                | BiP_Aa_1            | <u>atgcatcatcatcatcacatcacaagtttgtacaaaaaagttggcc</u><br>gccgagtacgatgaaacccaatctgaagggaacctccgaagtagaat<br>cagctgatgatgaaattgaaggtgttgacgcgaataaagggtccgatcc<br>tttattctggcgacgccgaagccgccggtattgtctaccgtctcgt<br>tggatataccgctgcgtgtgctactacgctcgccgcgatacatcgtc<br>gccgccgatacatcgtcgcagaagatgctatgctttaataacacgcag<br>aagatggttcagacgaagagggttaacttccatggcacgaaaattgctg<br>aagacattcgttgattaatcgtagagctgtaaagggtgtttaaaaattg<br>tagtagatgctgattctgattttacgctgatagggtgcatgc                                                                                                                                                                                                                                                                                                                                                                                                                                                                                                                                                                               | RRVR                                     | no significant similarity                           |               |                    |              |
| Aa_112_6C                | BiP_Aa_2            | <u>atgcatcatcatcatcacatcacaagtttgtacaaaaaagttggcc</u><br>aacttttttgtacaaaagttgtccccacatag                                                                                                                                                                                                                                                                                                                                                                                                                                                                                                                                                                                                                                                                                                                                                                                                                                                                                                                                                                    | QLFCTKLSPT                               | heat shock protein Hsp110 [ <i>Aurelia aurita</i> ] | AAX09921.2    | 70                 | 71           |
| Aa_127_8A                | BiP_Aa_3            | <u>atgcatcatcatcatcacatcacaagtttgtacaaaaaagttggat</u><br>ggctcttgagcagtacacagaagtaaatcagtcatcaaaatggacc<br>agaagaatgcttaagagaccagaactcaagacaataataaattcatc<br>atgcataattcatcgttcataaattctcgattgtagtttgtgaagg<br>tgcttcttaactgaatgtgtccaactagctaaaaaaaaaattcctag ctttttaa                                                                                                                                                                                                                                                                                                                                                                                                                                                                                                                                                                                                                                                                                                                                                                                     | WS                                       | no significant similarity                           |               |                    |              |
| Aa_127_8E                | BiP_Aa_4            | <u>atgcatcatcatcatcacatcacaagtttgtacaaaaaagttggca</u><br>cacattctacaatgaacttcgagttgcaccagaggagcatccagtcctg<br>ctcaccgaagctcctttaaatccaaaagctaacagggaagatgacac<br>aaattatgttcgaaccttcaacagccctgcaatgtacgtcgccatcca<br>agccgtactgtccctgtacgcctctggctgtaccaccggtatcgttctt<br>gattccggagatgggtcagccacactgtccaatctacgaaggttatg<br>ccctccccacgccatccggtttggatttggctggacgtgatttgac<br>cgactacttgatgaagatcctcaccgagagaggttactcattcaccacc<br>accgccgaagggaatcgtcagagacatcaaggagaaactctgctatg<br>tcgcactcgacttccaacaagaatgctcacagcatcaaccagctcaag<br>cttggaagaagctacgaattacctgacgggacaggtcatcaccatcgg<br>aaacgagagattcaggtgccagaaacccctcttctaaccgcattcat<br>cggaatggaatcaagcggaatccacgagaccaccatacaaatcaatca<br>tgaaaatgcgatgtcgacatccgtaggacttgcacgaacaccgtctt<br>tgtctggaggtagcactatgttcccagggtatccgccgacagaatgcac<br>aaggagatcgcttccctcgacccctcaacctgaaaattcagatcatc<br>gccccaccagagtaggaaactactcccgtatgggatcggaggtccatc<br>ttggcttcccctctccacctctccaccagatgtcgcatctgcaatcaa<br>gaatatggatgaatcctgggcccatccattctctaccacgaaaacgct<br>tccttacaccgcctctgcgcacacttttcaa | THSTMNLFELHQRSIQSCSPKLL                  | retinoid X receptor [ <i>Aurelia aurita</i> ]       | AGT42223.1    | 40                 | 71           |
| Aa_127_8F                | BiP_Aa_5            | <u>atgcatcatcatcatcacatcacaagtttgtacaaaaaagttgggg</u><br>taaggaaacagtgttctatccgtcgaggcgactgtatgttagaaagt<br>agtagcactgttttagtagtttaacgataaatcttgaaatgatatctaa caaaatgtgttga                                                                                                                                                                                                                                                                                                                                                                                                                                                                                                                                                                                                                                                                                                                                                                                                                                                                                  | VRNSVLFRRRRLVC                           | hypothetical protein [ <i>Aurelia aurita</i> ]      | AGN03863.1    | 35                 | 100          |
| Aa_127_8H                | BiP_Aa_6            | <u>atgcatcatcatcatcacatcacaagtttgtacaaaaaagttggga</u><br>caaactttacaaggagttcccagttataaactcatcaccatcagtg<br>gtatctgaaagattgaaggtcagagtttcactgcacgcacatgcttga<br>aagaactgttgggaaaaggccttatccgggaagtttccaacatagtg<br>tcagatgatctacactagagctacaaaagggtgcgaataactttgt<br>ttataagcaatgttgatcttgaaaatgagtaatctttaaaagcta                                                                                                                                                                                                                                                                                                                                                                                                                                                                                                                                                                                                                                                                                                                                            | TNFTRKFPVINSSPHQWYLKD                    | toxin TX1 [ <i>Aurelia aurita</i> ]                 | AFK76348.1    | 66                 | 55           |

|            |          |                                                                                                                                                                                                                                                                                                                                                                                                                                                                                                                                                                                                                                                                                                                                                                                                                                                                  |                 |                                      |                |    |     |
|------------|----------|------------------------------------------------------------------------------------------------------------------------------------------------------------------------------------------------------------------------------------------------------------------------------------------------------------------------------------------------------------------------------------------------------------------------------------------------------------------------------------------------------------------------------------------------------------------------------------------------------------------------------------------------------------------------------------------------------------------------------------------------------------------------------------------------------------------------------------------------------------------|-----------------|--------------------------------------|----------------|----|-----|
| MI_068_11H | BiP_ML_1 | atgcatcatcatcatcacatcacaagttgtacaaaaagtggaa<br>taatttgagcaataagcgagcttcatgaagagagcagaaaggtag<br>tatcgggggacaaacgaactgtccttaagcgtaacagactacagaata<br>caccatcgtgcgttcaggattttggcaagttcatgtgacagtaaaac<br>gagatgagttcacgagaggttgatctcaaggagcaactgcgagctata<br>cgacaacgtatacaagtacaatacgaatcctcatcaatcagcacggtc<br>aaatatthggataaataatgcagccgggattttgtttgcttcctt<br>ctatttcatagctttgaacaaatacagagacctgggtactcggcgttg<br>tactttgattaataataatagtcatagtttgaattatttaaacttcgt<br>agtcttagtctccgctgtcccattaaagattctaaatcgctgttg<br>actcgaactttcgccatttttaactgtatgcctcaattttcaaat<br>tcaactcttatgttttaataatacagttgagaattatgtggctacgag<br>catcagttggagcactgaagctaattttgtaccggactgtcact<br>tataggctcctcatctcataaaaaattaaaaacaaatggagtactg<br>ttccaattaatthtctactattttatggattttaaattactttatt actac                                                                             | II              | no significant similarity            |                |    |     |
| MI_011_11H | BiP_ML_2 | atgcatcatcatcatcacatcacaagttgtacaaaaagtggca<br>actactattaattaataatttgaggcaaggctccaggttcttgcgtaa<br>gcggcattcaagatggcgcccaaacacaacatatggttttgacagcc<br>atttcacaaggattggcaaaggtatgtcaaaacctggttcaaccaagc<br>cggtaagaagaagcgaggcgcaaaaacgtatggagaaggctaaagct<br>gtcgccctcgcccagttgtggtctgtccgacctgtgtacattgtc<br>agactatcagatacaacgcccgagtcagagccggccgaggtttaccct<br>cgacgaactcaagctgtggtatcaacaagaagcaagctctctcaatc<br>ggaattgctgttgaccacagaagggaagaacaggtctcaggagagtctcc<br>aagctaatttctcagactgaaggagtacaagagcaggtcatcctctt<br>cccacgaaaggcctccaaaccaagaagggagacgacccagggtgag<br>atcgatgtcgccactcagctgaccggacctgtcctacccatcaaacaga<br>cctggtctgataccaccgagagcaatcacggacgaggagaagaaca<br>atctgctttccagacgatgagaatgtacagagccaatgttcgacttgtt<br>ggagttcgagaaaaacgagccaagggaagccgcccgggatgacggtctgg<br>gagtcaagaagaagaagaaaataatttatttcgggttttttatctttta tcgataatgtca | NYN             | no significant similarity            |                |    |     |
| MI_010_9A  | BiP_ML_3 | atgcatcatcatcatcacatcacaagttgtacaaaaagtggcg<br>gccgcacaactttgtacaagaaagtgggttttttttttttaaca<br>tttttaaattttattttctattttgattttttatatgacaaatta<br>atttattttccatttaataatgttaaaaaaaacaaaaaa<br>ccaaaaacaaaaacccccacctttctgtccaattgggtatctagg<br>tataatcggaatccggtgtctaccaacccgaaaggaaacttgctggc<br>tgcccccccgctgccaataactagcataacccttggggccttcaa<br>cgggttttgaggggtttttgtctgaaggagggaacaattcccggtttc ccga                                                                                                                                                                                                                                                                                                                                                                                                                                                            | GRTTLYKKVGGFFFF | ND5 gene product [Mnemiopsis leidyi] | YP_004927440.1 | 73 | 100 |

**Table S2: Statistics derived from unpaired t-test for growth-inhibiting effects of peptides shown in Figure 2.** Unpaired t-test results were calculated with GraphPad. SD, standard deviation calculated from 2 biological, each with 8 technical replicates; t, t-statistic; df, degrees of freedom

|                       |            |            |            |            |            |            |            |                                                                                                                                                                                                                                           |  |
|-----------------------|------------|------------|------------|------------|------------|------------|------------|-------------------------------------------------------------------------------------------------------------------------------------------------------------------------------------------------------------------------------------------|--|
| <i>K. oxytoca</i>     |            |            |            |            |            |            |            | <div>Symbol</div> <div>Meaning</div> <div>growth inhibition</div> <div>growth promotion</div> <div>ns</div> <div>*</div> <div>**</div> <div>***</div> <div>P &gt; 0.05</div> <div>P ≤ 0.05</div> <div>P ≤ 0.01</div> <div>P ≤ 0.001</div> |  |
| treatment             | control    | IDR-1018   | BiP_Aa_2   | BiP_Aa_4   | BiP_Aa_5   | BiP_Aa_6   | BiP_Ml_3   |                                                                                                                                                                                                                                           |  |
| turbidity             | 1.21326667 | 1.186925   | 1.2036875  | 1.219475   | 1.25715    | 1.2508     | 1.25545    |                                                                                                                                                                                                                                           |  |
| SD                    | 0.02265977 | 0.01371174 | 0.01282045 | 0.05077339 | 0.01444717 | 0.02106066 | 0.02517361 |                                                                                                                                                                                                                                           |  |
| replicates            | 16         | 16         | 16         | 16         | 16         | 16         | 16         |                                                                                                                                                                                                                                           |  |
| p-value               |            | 0.0004     | 0.1515     | 0.6583     | 0.0001     | 0.0001     | 0.0001     |                                                                                                                                                                                                                                           |  |
| t                     |            | 3.9783     | 1.4717     | 0.4466     | 6.5318     | 4.8531     | 4.9818     |                                                                                                                                                                                                                                           |  |
| df                    |            | 30         | 30         | 30         | 30         | 30         | 30         |                                                                                                                                                                                                                                           |  |
| <i>P.aeruginosa</i>   |            |            |            |            |            |            |            |                                                                                                                                                                                                                                           |  |
| treatment             | control    | IDR-1018   | BiP_Aa_2   | BiP_Aa_4   | BiP_Aa_5   | BiP_Aa_6   | BiP_Ml_3   |                                                                                                                                                                                                                                           |  |
| turbidity             | 1.2788369  | 1.2296125  | 1.2593     | 1.28101429 | 1.24941429 | 1.2841125  | 1.254575   |                                                                                                                                                                                                                                           |  |
| SD                    | 0.02236065 | 0.03617095 | 0.0265339  | 0.03674385 | 0.0347689  | 0.03765816 | 0.02866537 |                                                                                                                                                                                                                                           |  |
| replicates            | 16         | 16         | 16         | 16         | 16         | 16         | 16         |                                                                                                                                                                                                                                           |  |
| p-value               |            | 0.0001     | 0.0318     | 0.8409     | 0.0079     | 0.6334     | 0.0121     |                                                                                                                                                                                                                                           |  |
| t                     |            | 4.6302     | 2.2521     | 0.2025     | 2.847      | 0.4818     | 2.6694     |                                                                                                                                                                                                                                           |  |
| df                    |            | 30         | 30         | 30         | 30         | 30         | 30         |                                                                                                                                                                                                                                           |  |
| <i>S. aureus</i>      |            |            |            |            |            |            |            |                                                                                                                                                                                                                                           |  |
| treatment             | control    | IDR-1018   | BiP_Aa_2   | BiP_Aa_4   | BiP_Aa_5   | BiP_Aa_6   | BiP_Ml_3   |                                                                                                                                                                                                                                           |  |
| turbidity             | 1.37192917 | 1.0359875  | 1.3037125  | 1.346525   | 1.3122125  | 1.379525   | 1.34535    |                                                                                                                                                                                                                                           |  |
| SD                    | 0.03806921 | 0.17578437 | 0.02387994 | 0.03444217 | 0.03913066 | 0.05216267 | 0.02014105 |                                                                                                                                                                                                                                           |  |
| replicates            | 16         | 16         | 16         | 16         | 16         | 16         | 16         |                                                                                                                                                                                                                                           |  |
| p-value               |            | 0.0001     | 0.0001     | 0.057      | 0.0001     | 0.6414     | 0.0195     |                                                                                                                                                                                                                                           |  |
| t                     |            | 7.4712     | 6.0719     | 1.9794     | 4.3754     | 0.4705     | 2.4685     |                                                                                                                                                                                                                                           |  |
| df                    |            | 30         | 30         | 30         | 30         | 30         | 30         |                                                                                                                                                                                                                                           |  |
| <i>S. epidermidis</i> |            |            |            |            |            |            |            |                                                                                                                                                                                                                                           |  |
| treatment             | control    | IDR-1018   | BiP_Aa_2   | BiP_Aa_4   | BiP_Aa_5   | BiP_Aa_6   | BiP_Ml_3   |                                                                                                                                                                                                                                           |  |
| turbidity             | 1.3398     | 1.2033875  | 1.36845    | 1.3859125  | 1.3013125  | 1.39345    | 1.36715    |                                                                                                                                                                                                                                           |  |
| SD                    | 0.01995141 | 0.01700263 | 0.01306823 | 0.0152605  | 0.02536809 | 0.01       | 0.02       |                                                                                                                                                                                                                                           |  |
| replicates            | 16         | 16         | 16         | 16         | 16         | 16         | 16         |                                                                                                                                                                                                                                           |  |
| p-value               |            | 0.0001     | 0.0001     | 0.0001     | 0.0001     | 0.0001     | 0.0005     |                                                                                                                                                                                                                                           |  |
| t                     |            | 20.8156    | 4.805      | 7.3432     | 4.7701     | 9.6159     | 3.8726     |                                                                                                                                                                                                                                           |  |
| df                    |            | 30         | 30         | 30         | 30         | 30         | 30         |                                                                                                                                                                                                                                           |  |
